# Supplementary material for: Sustained Nrf2 Overexpression-Induced Metabolic Deregulation Can Be Attenuated by Modulating Insulin/Insulin-like Growth Factor Signaling
Source: MDPI journal article supplement (doi:10.3390/cells12222650), 2023-11-18
Supplement: s1 [file s1]

# Sustained Nrf2 overexpression-induced metabolic deregulation can be attenuated by modulating the insulin/insulin-like growth factors signaling

Sentiljana Gumeni, Maria Lamprou, Zoi Evangelakou, Maria S. Manola, Ioannis P. Trougakos

## Supporting Material

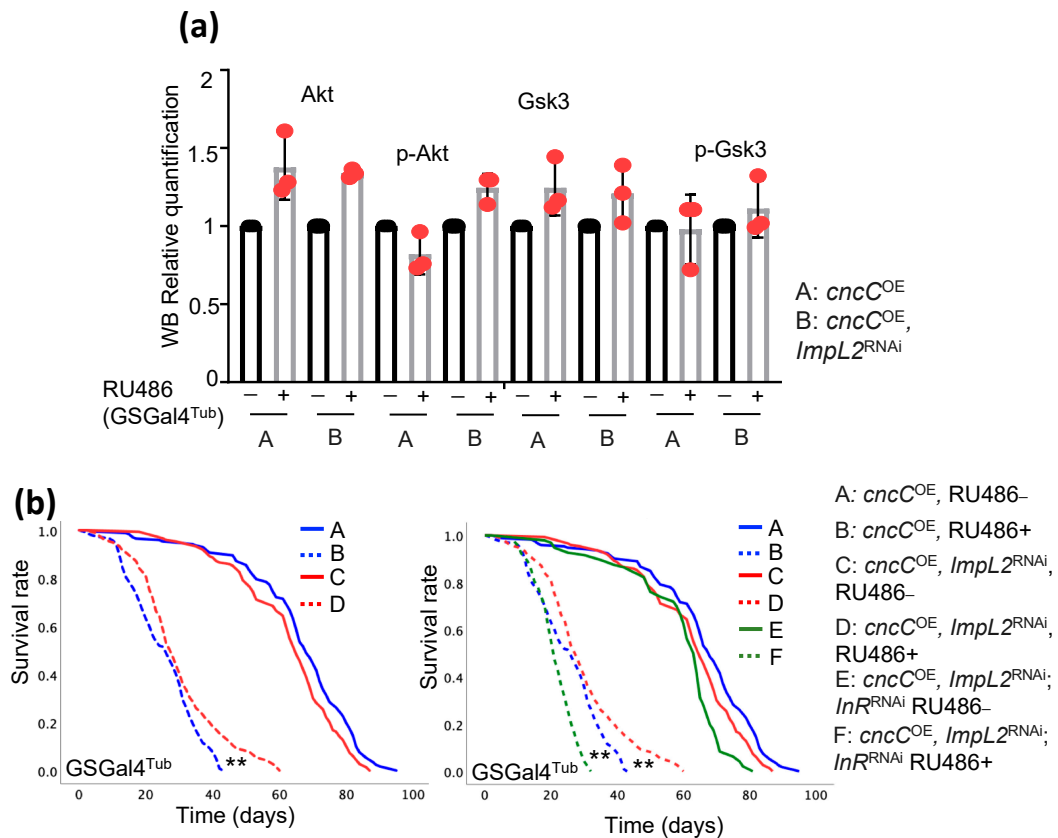

**Figure S1.** Relative western blots quantification and longevity assays. (a) Relative immunoblotting quantification ( $n=3$ ) of tissue protein samples probed with antibodies against p-Akt, Akt, Gsk3, p-Gsk3, after ubiquitous downregulation (or not) of *ImpL2* in *cnc*<sup>COE</sup> flies. (b) Longevity curves of the described genotypes. Log-rank, Mantel-Cox test: *cnc*<sup>COE</sup> RU486- vs *cnc*<sup>COE</sup> RU486+  $P < 0.000$ ; *cnc*<sup>COE</sup>, *ImpL2*<sup>RNAi</sup> RU486- vs *cnc*<sup>COE</sup>, *ImpL2*<sup>RNAi</sup> RU486+  $P < 0.000$ ; *cnc*<sup>COE</sup> RU486+ vs *cnc*<sup>COE</sup>, *ImpL2*<sup>RNAi</sup> RU486+  $P < 0.000$ ; *cnc*<sup>COE</sup>, *ImpL2*<sup>RNAi</sup>, *InR*<sup>RNAi</sup> RU486- vs *cnc*<sup>COE</sup>, *ImpL2*<sup>RNAi</sup>, *InR*<sup>RNAi</sup> RU486+  $P < 0.000$ ; *cnc*<sup>COE</sup> RU486+ vs *cnc*<sup>COE</sup>, *ImpL2*<sup>RNAi</sup>, *InR*<sup>RNAi</sup> RU486+  $P < 0.000$ ; *cnc*<sup>COE</sup>, *ImpL2*<sup>RNAi</sup> RU486+ vs *cnc*<sup>COE</sup>, *ImpL2*<sup>RNAi</sup>, *InR*<sup>RNAi</sup> RU486+  $P < 0.000$ .

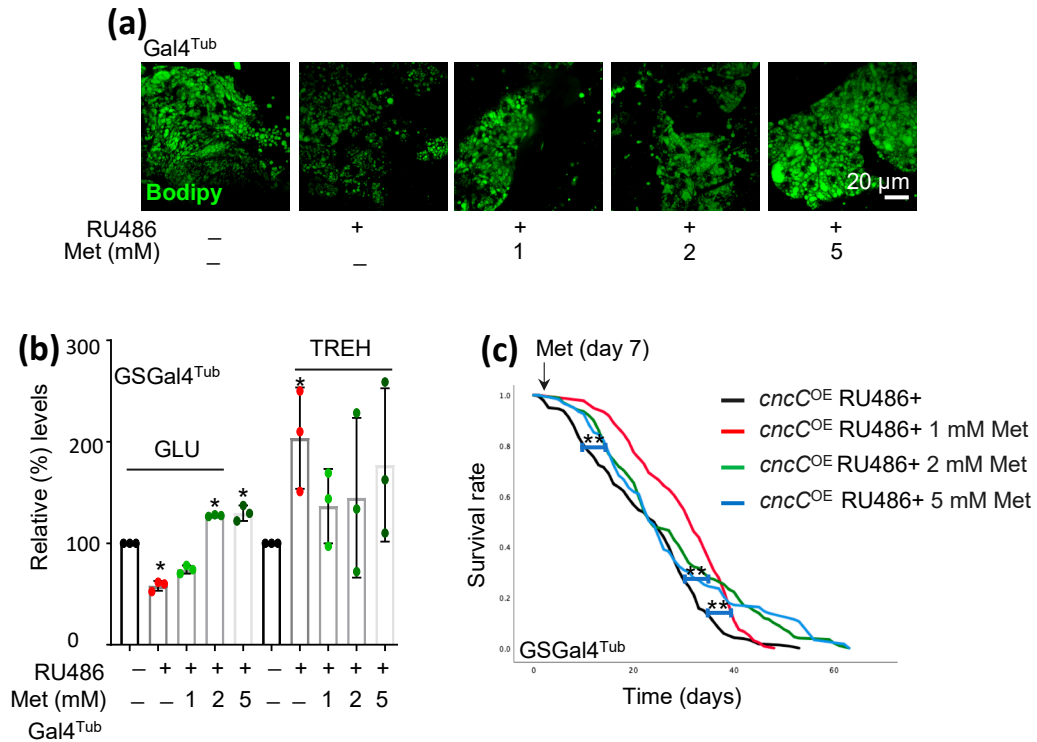

**Figure S2.** Metabolic alterations after Met treatment of *cncCOE* transgenic flies. (a) CLSM visualization of *cncCOE* fat body (Bodipy/green) lipid droplets after treatment (or not) with Met at different concentrations. (b) GLU and TREH levels (% vs non-treated *cncCOE* flies) in somatic tissues of *cncCOE* flies following Met treatment. (c) Longevity curves of *cncCOE* adult flies treated with the indicated concentrations of Met for 7 days (starting point of treatment at day 7 is indicated in the graph with the arrow) post-induction of *cncCOE* (Log-rank, Mantel-Cox test: *cncCOE* vs *cncCOE* 1mM Met  $P < 0.000$ ; *cncCOE* vs *cncCOE* 2mM Met  $P < 0.000$ ; *cncCOE* vs *cncCOE* 5mM Met  $P < 0.000$ ). In (a, b) flies were exposed to 320  $\mu$ M RU486 for 10 days; Met treatment was applied for 3 days starting from day 7 post-*cncCOE* induction. Bars,  $\pm$ SD;  $n=3$ ; \*\* $P < 0.01$ .

### Supplementary list of genes assayed

*Akt* (akt kinase, FBgn0010379, CG4006); *bmm* (brummer/Atgl, FBgn0036449, CG5295); *cncC* (cap-n-collar isoform-C, FBgn0262975, CG43286); *Ilp2* (Insulin-like peptide 2, FBgn0036046, CG8167); *Ilp3* (Insulin-like peptide 3, FBgn0044050, CG14167); *ImpL2* (Ecdysone-inducible gene L2, FBgn0001257); *InR* (Insulin-like receptor, FBgn0283499, CG18402); *Keap1* (Kelch-like ECH-associated protein 1, FBgn0038475, CG3962); *Prosa7* (Proteasome  $\alpha$ 7 subunit, FBgn0023175, CG1519); *Prosb5* (Proteasome  $\beta$ 5 subunit, FBgn0029134, CG12323); *RpL32/rp49* (Ribosomal protein L32, FBgn0002626, CG7939); *Rpn6* (Regulatory particle non-ATPase 6, FBgn0028689, CG10149); *Rpn11* (Regulatory particle non-ATPase 11, FBgn0028694, CG18174); *sgg* (shaggy/GSK3, FBgn0003371, CG2621); *GlyS* (Glycogen synthase, FBgn0266064, CG6904).
